# Supplementary material
Source: PubMed Central journal article supplement (PMC5283599)
Supplement: EMBR-17-1872-s001.pdf [file EMBR-17-1872-s001.pdf]

## **Appendix**

**Table of contents:** Appendix Figure S1

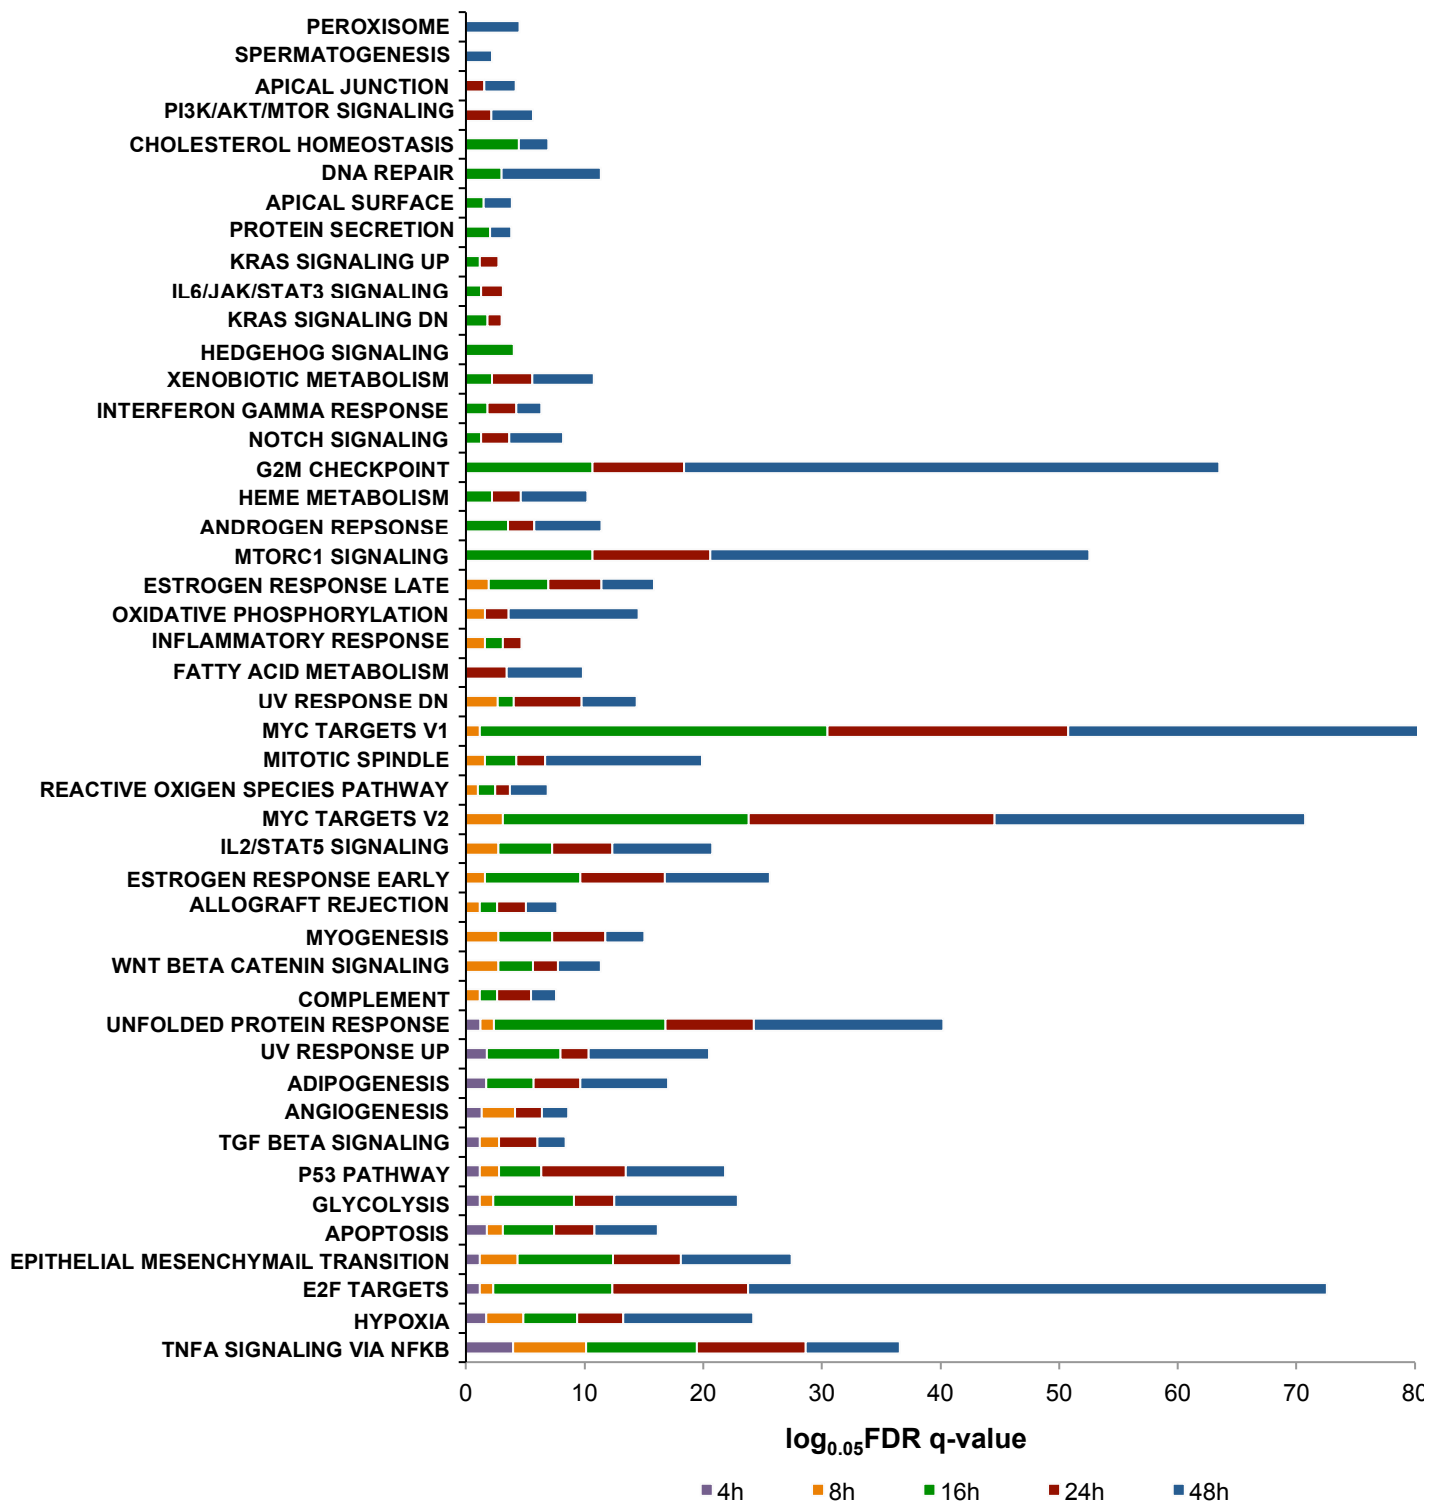

### Gene Set Enrichment Analysis of MYC target genes upon Omomyc induction in BT168FO cells

Enrichment of MSigDB hallmark gene sets (left) among genes that present a MYC peak – at promoter, intragenic, and intergenic regions – in BT168FO cells and whose mRNAs are modulated upon Dox treatment (estimated by CuffDiff2;  $q$ -value  $\leq 0.05$ ). FDR  $q$ -values were computed through GSEA; only gene sets with FDR  $q$ -value  $\leq 0.05$  were included. Colours correspond to the different Dox treatment durations (0 - 48 h). The height of coloured bars to the right of each gene set represents the  $\log_{0.05}$  of the FDR  $q$ -value of that gene set at the various times of Dox treatment.
